# Supplementary material for: Achieving water budget closure through physical hydrological processes modelling: insights from a large-sample study
Source: Copernicus journal article supplement (doi:10.5194/hess-2024-230), 2024-08-05
Supplement: Supplementary file 1 [file hess-2024-230-supplement.pdf]

*Supplement of*

## **Achieving Water Budget Closure through Physical Hydrological Processes Modelling: Insights from a Large-Sample Study**

Xudong Zheng<sup>1</sup>, Dengfeng Liu<sup>1\*</sup>, Shengzhi Huang<sup>1\*</sup>, Hao Wang<sup>2</sup>, Xianmeng Meng<sup>3</sup>

5 <sup>1</sup>State Key Laboratory of Eco-hydraulics in Northwest Arid Region of China, School of Water Resources and Hydropower, Xi'an University of Technology, Xi'an, 710048, China

<sup>2</sup>State Key Laboratory of Simulation and Regulation of Water Cycle in River Basin, China Institute of Water Resources and Research, Beijing, 100038, China

<sup>3</sup>School of Environmental Studies, China University of Geosciences, Wuhan, 430074, China

10 *Correspondence to:* Dengfeng Liu ([liudf@xaut.edu.cn](mailto:liudf@xaut.edu.cn))

**Table S1.** Summary of the 18 excluded basins, including the id, location, area and excluded reasons.

| HRU ID   | Lat   | Lon     | Area (km <sup>2</sup> ) | Excluded reason                       |
|----------|-------|---------|-------------------------|---------------------------------------|
| 01118300 | 41.49 | -71.84  | 13.71                   | Data is missing between 1998 and 2010 |
| 01121000 | 41.87 | -72.17  | 94.70                   | Data is missing between 1998 and 2010 |
| 01187300 | 42.08 | -72.98  | 54.22                   | Data is missing between 1998 and 2010 |
| 01510000 | 42.69 | -75.81  | 382.93                  | Data is missing between 1998 and 2010 |
| 02125000 | 35.39 | -80.35  | 145.08                  | Incomplete observation in 2010        |
| 02202600 | 32.28 | -81.63  | 623.35                  | Data is missing between 1998 and 2010 |
| 03281100 | 37.05 | -83.75  | 425.26                  | Data is missing between 1998 and 2010 |
| 03300400 | 37.76 | -85.07  | 1128.56                 | Data is missing between 1998 and 2010 |
| 05062500 | 47.29 | -95.74  | 2435.96                 | Data is missing between 1998 and 2010 |
| 06154410 | 47.96 | -108.63 | 47.72                   | No observation in 2010                |
| 06291500 | 45.04 | -107.74 | 220.73                  | No observation in 2010                |
| 07290650 | 31.94 | -90.55  | 1694.64                 | Data is missing between 1998 and 2010 |
| 07295000 | 31.17 | -91.18  | 466.89                  | Data is missing between 1998 and 2010 |
| 08079600 | 33.24 | -101.86 | 3512.32                 | Data is missing between 1998 and 2010 |
| 09497800 | 34.04 | -110.51 | 751.79                  | Data is missing between 1998 and 2010 |
| 10173450 | 37.63 | -112.69 | 281.69                  | Data is missing between 1998 and 2010 |
| 12383500 | 47.14 | -113.92 | 17.70                   | Incomplete observation in 2010        |
| 12388400 | 47.24 | -114.40 | 76.56                   | Incomplete observation in 2010        |

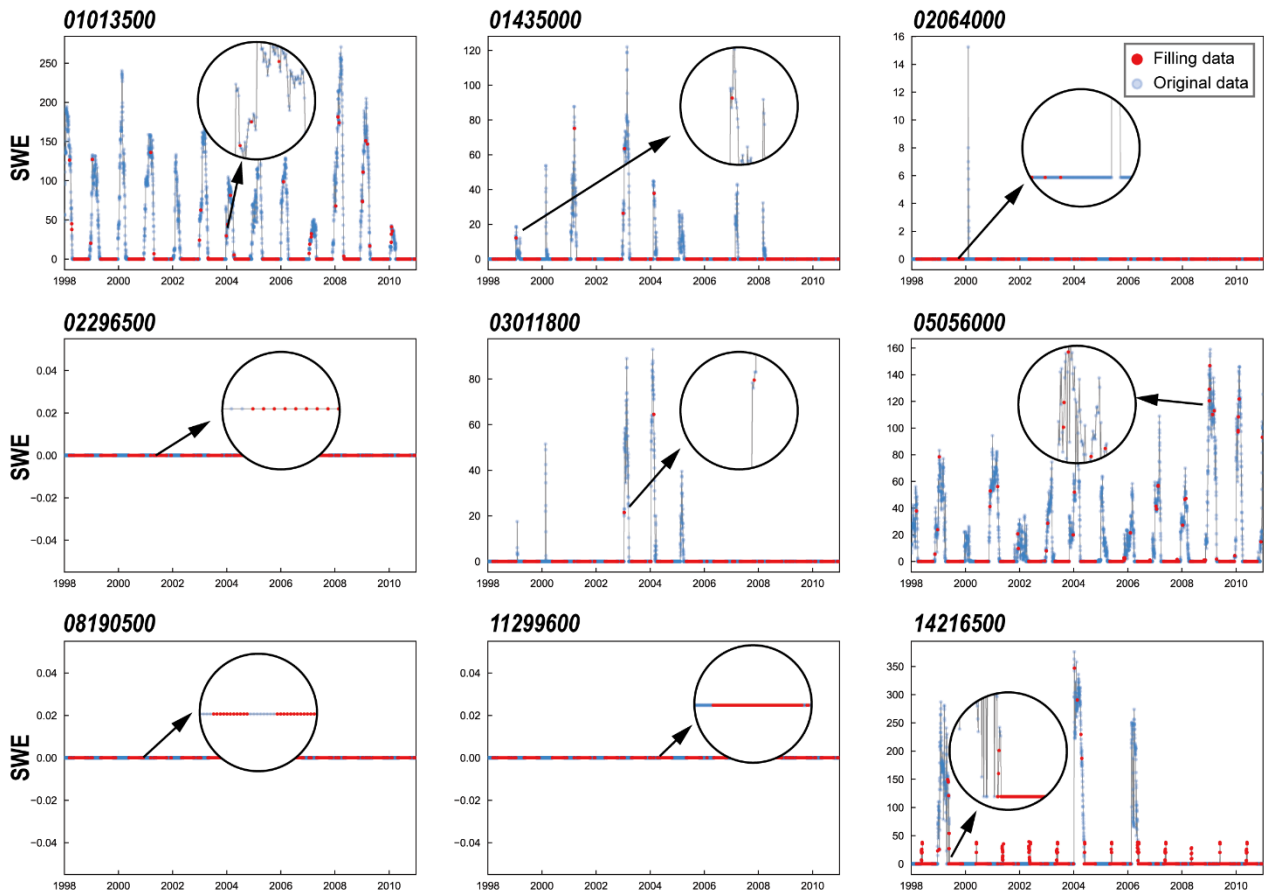

**Figure S1.** Schematic diagram of the gap filling process for GlobSnow SWE at nine randomly selected basins.

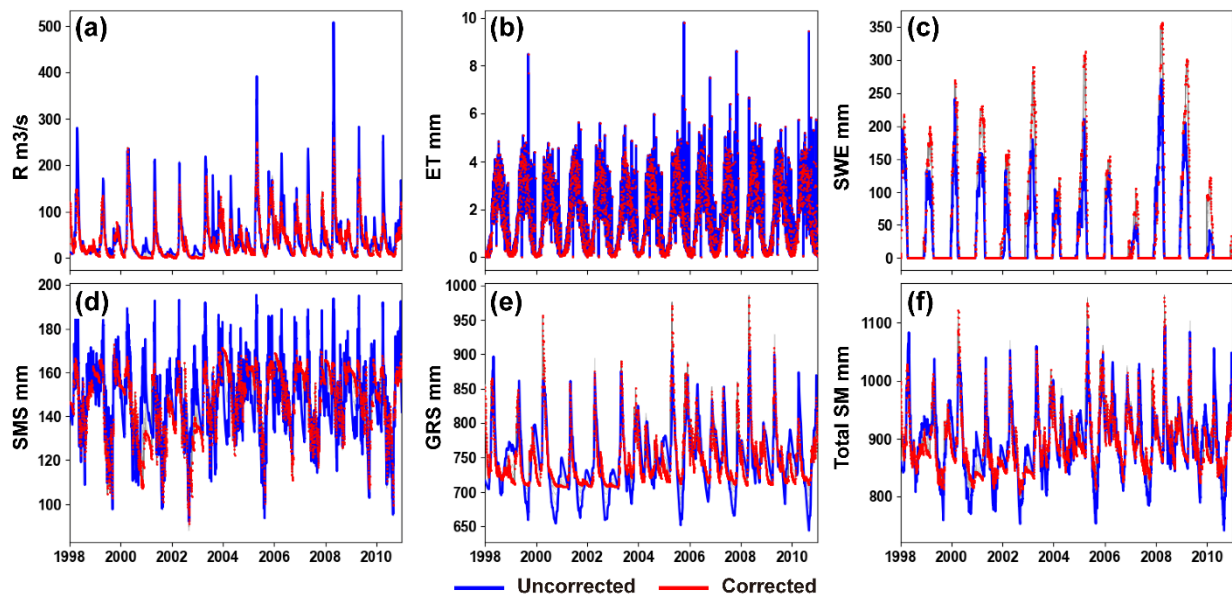

15 **Figure S2.** Time series of water budget variables before and after correction at basin 1013500. Note the total SM is the combination of SMS and GRS.

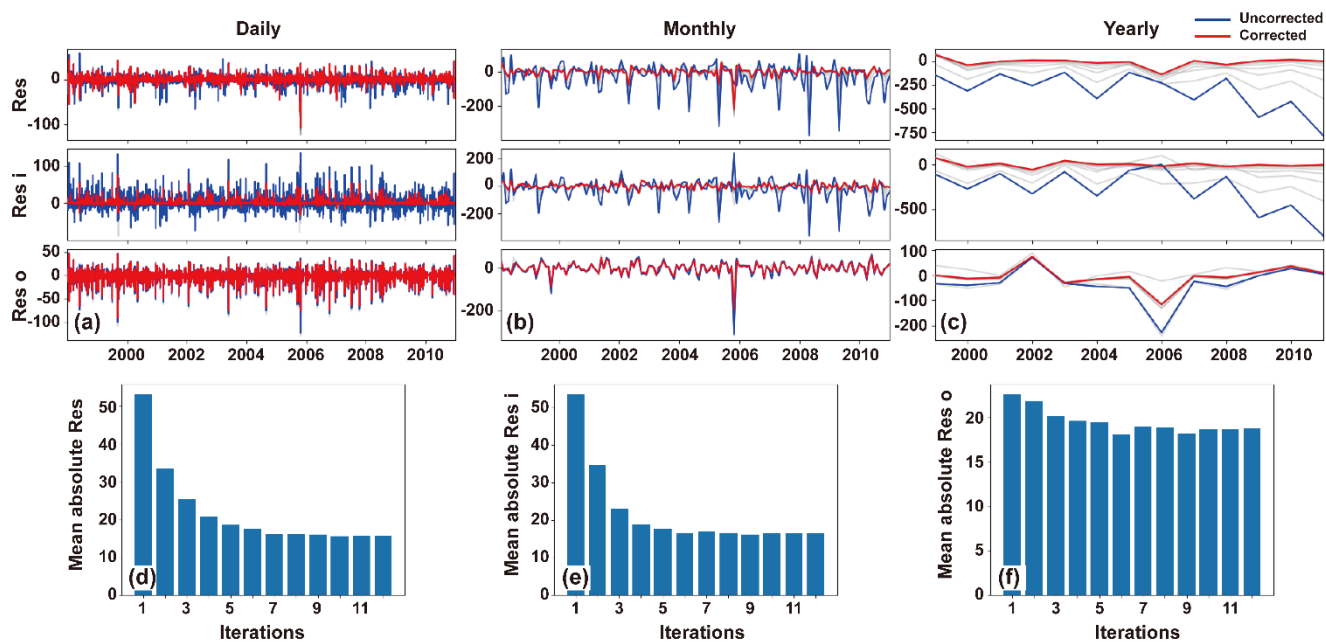

**Figure S3.** Same as Fig. 6, but for basin 1137500.

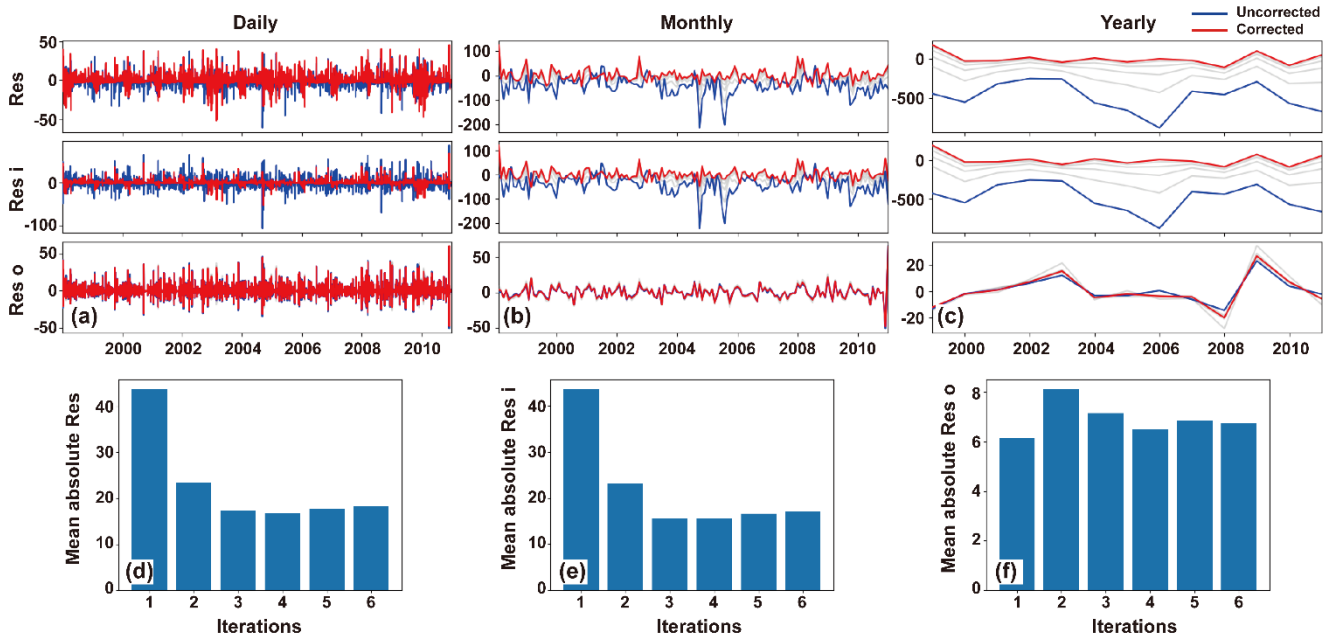

20 **Figure S4.** Same as Fig. 6, but for basin 2177000.

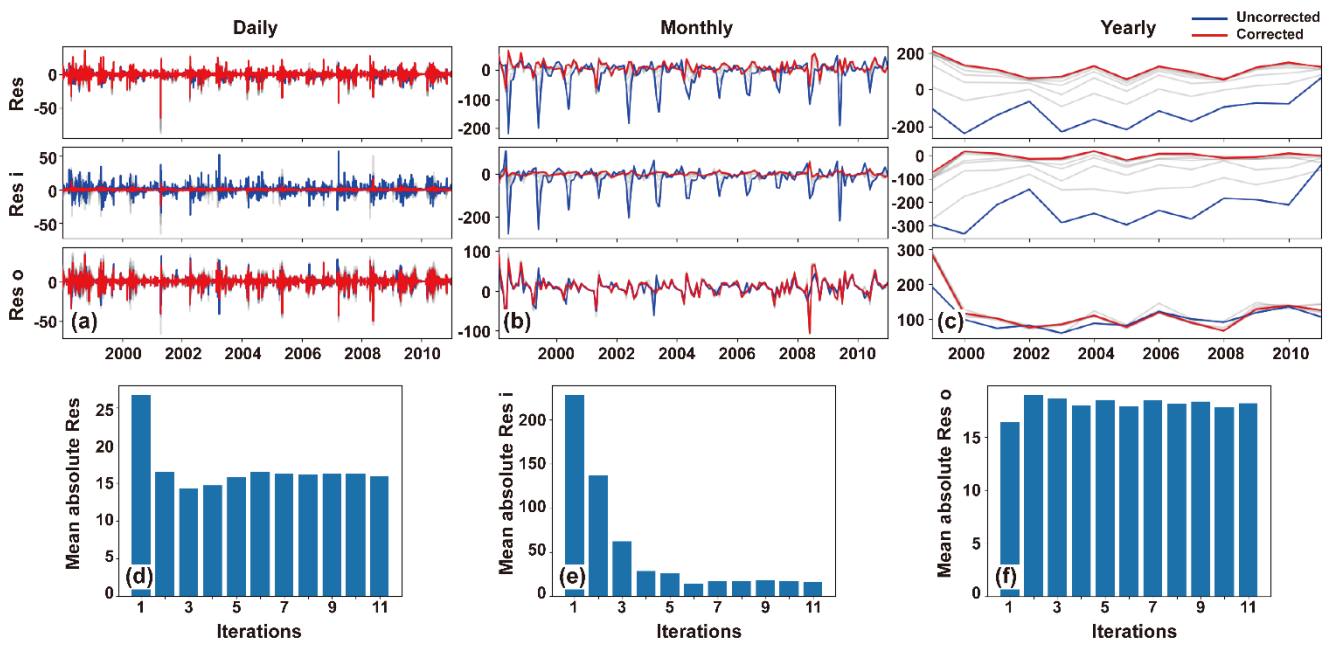

**Figure S5.** Same as Fig. 6, but for basin 6311000.

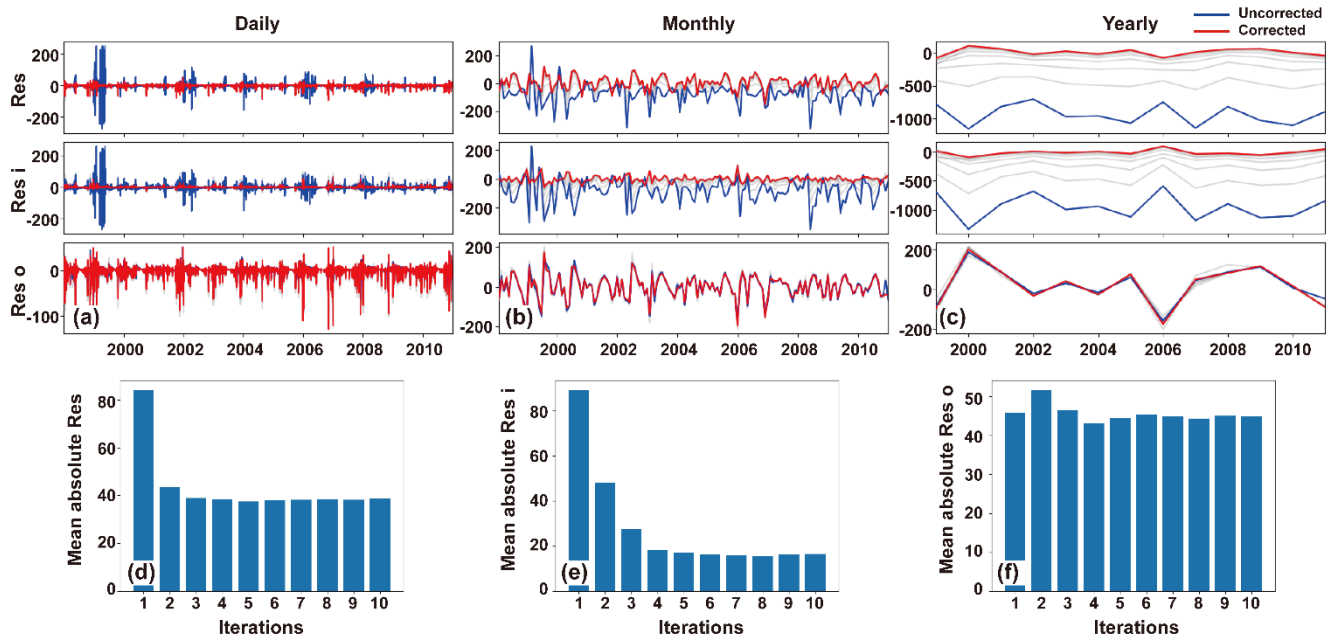

Figure S6. Same as Fig. 6, but for basin 14092750.

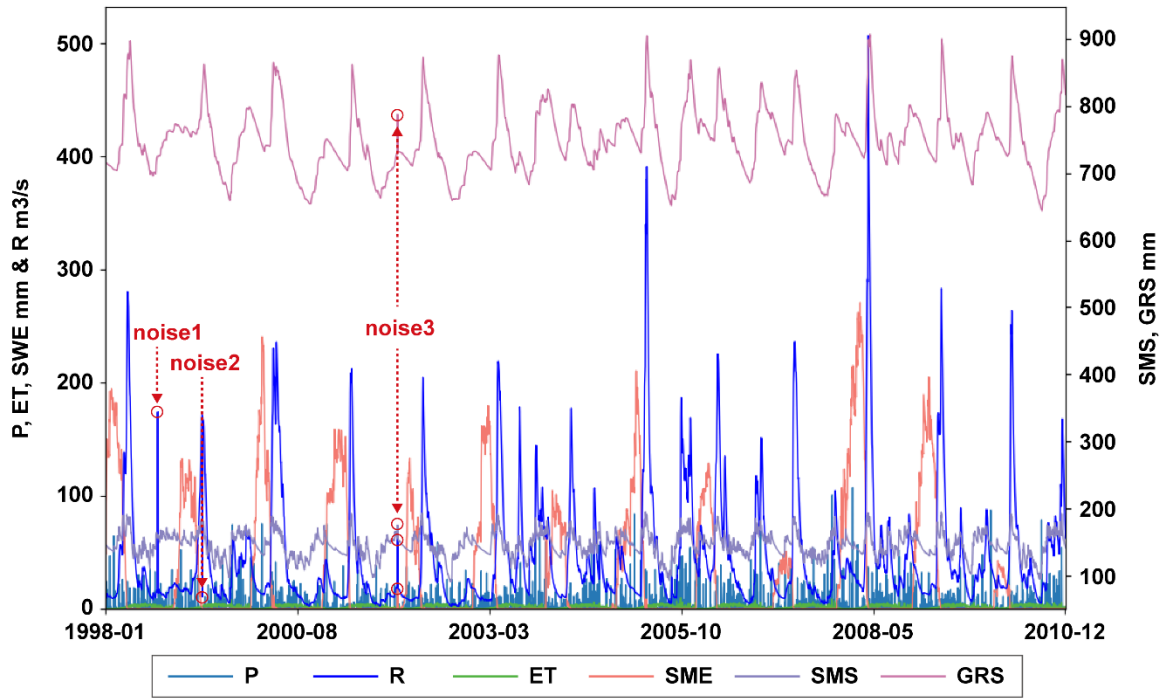

25

**Figure S7.** Noise sequence (NS1) generated by adding three single-point noises, corresponds to noise experiments 1-3.

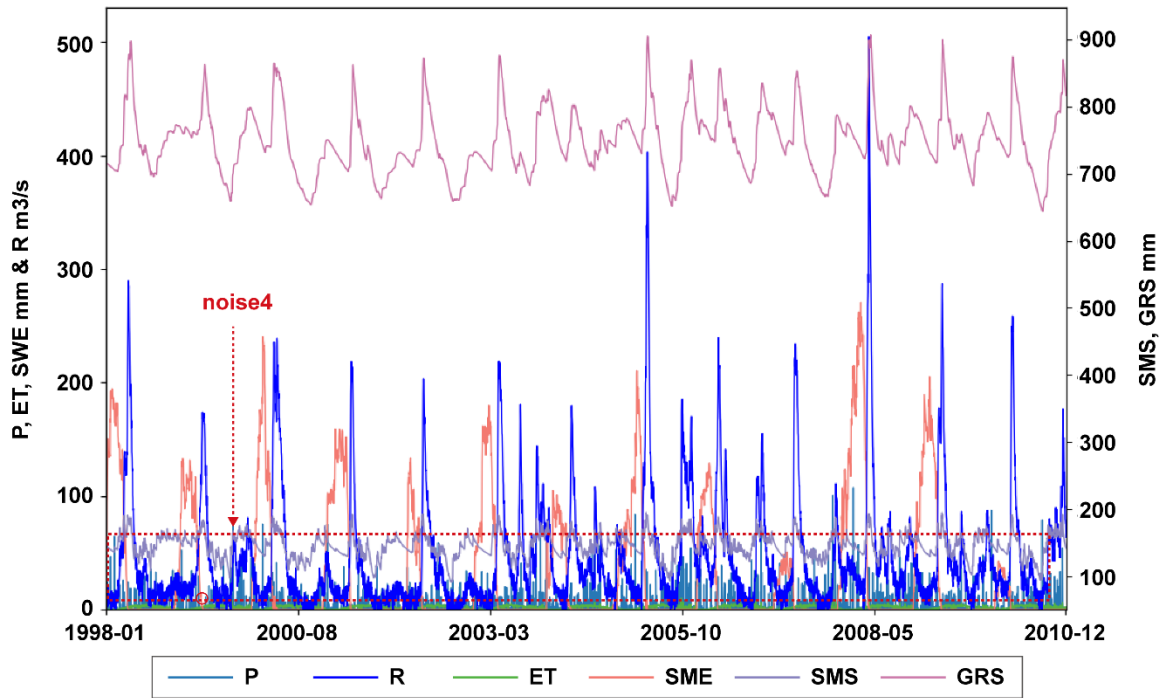

**Figure S8.** Noise sequence (NS2) generated by adding a Gaussian white noise sequence into the runoff, corresponds to noise experiment 4.

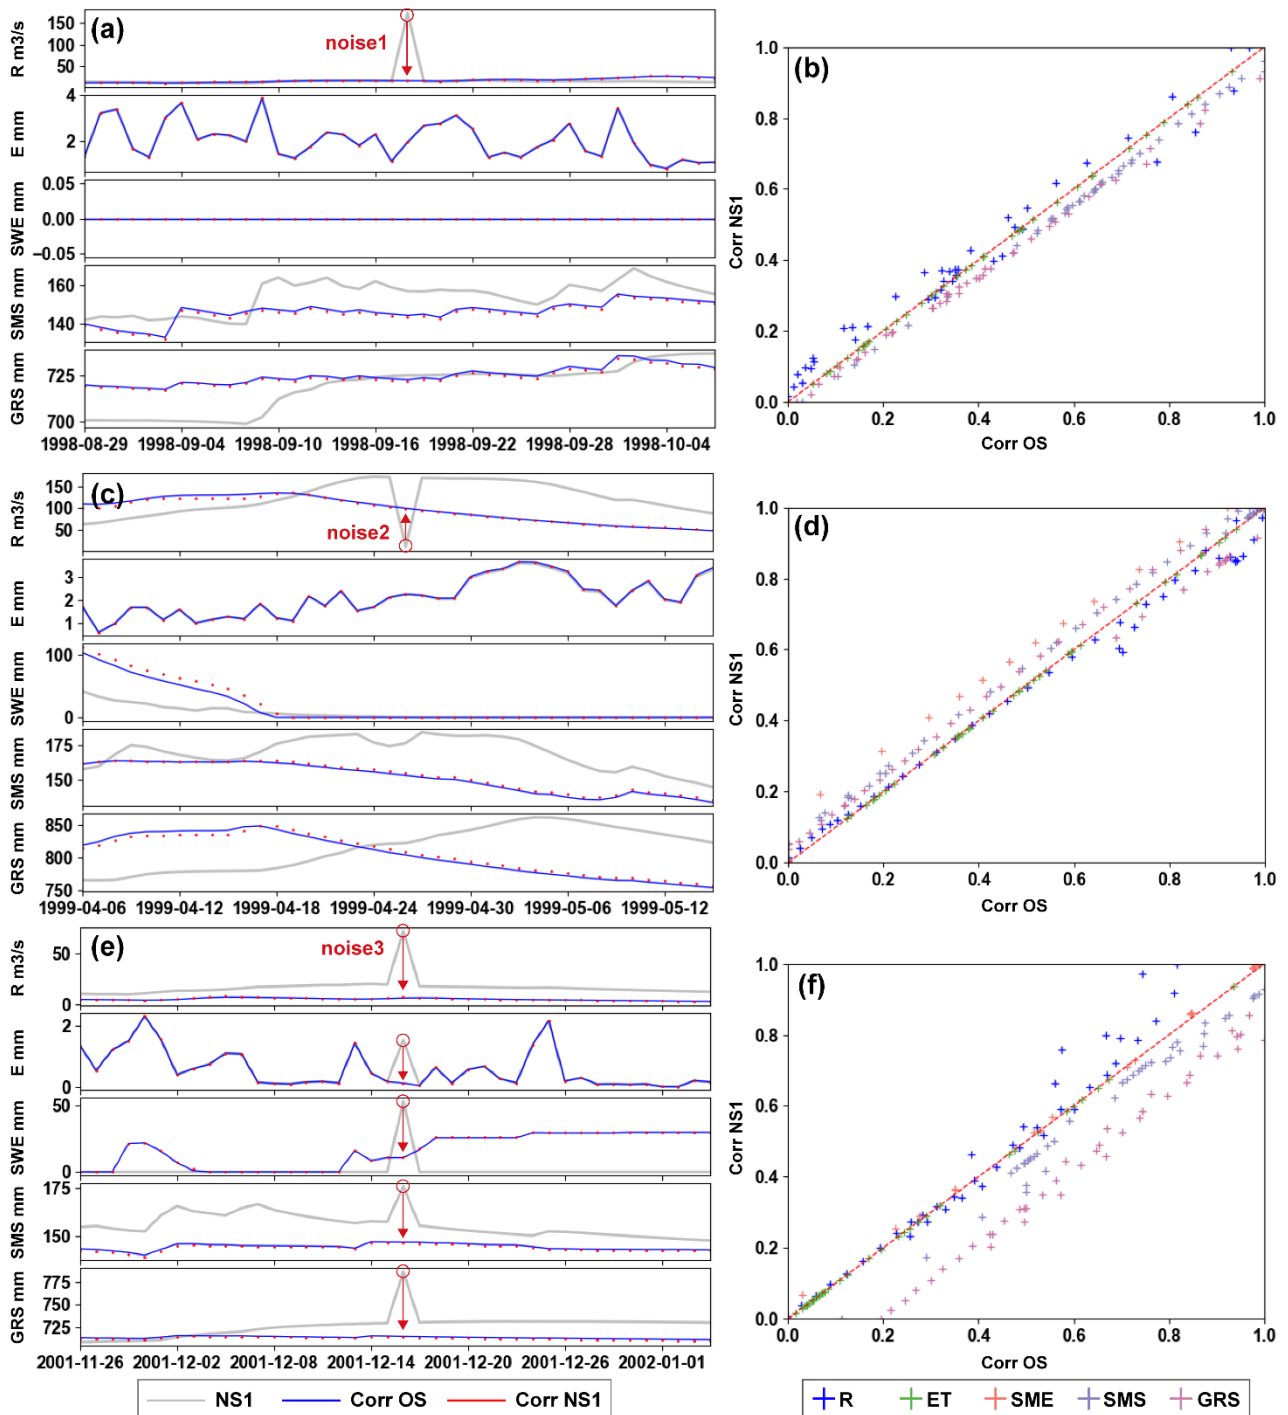

30 **Figure S9.** Correction results for multisource datasets around noises 1-3. Panels in the left column depict the time series of OS-based and NS1-based correction (Corr OS and Corr NS1), while panels in the right column compare them in terms of standardized values.



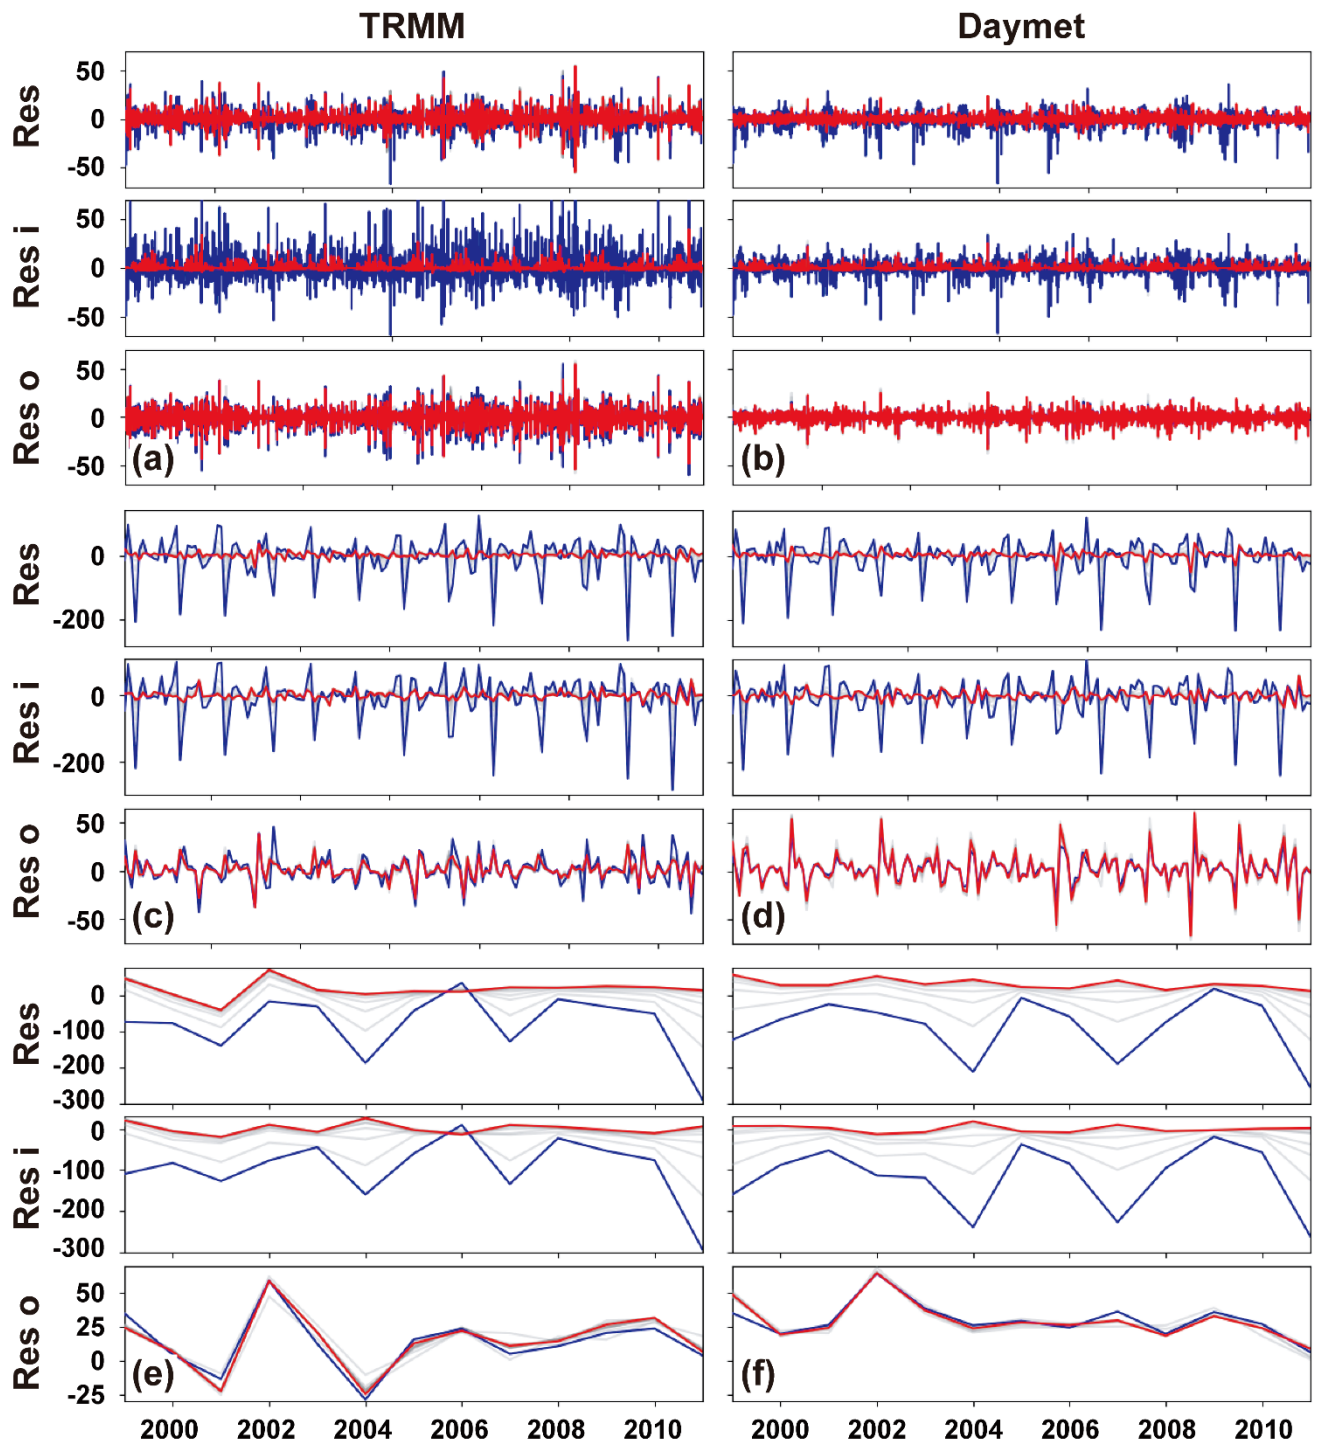

**Figure S10.** Comparison of correction results based on different forcing datasets (TRMM and Daymet) at basin 1013500. Time series of three types of residuals at daily (a-b), monthly (c-d), and yearly (e-f) timescales, respectively.

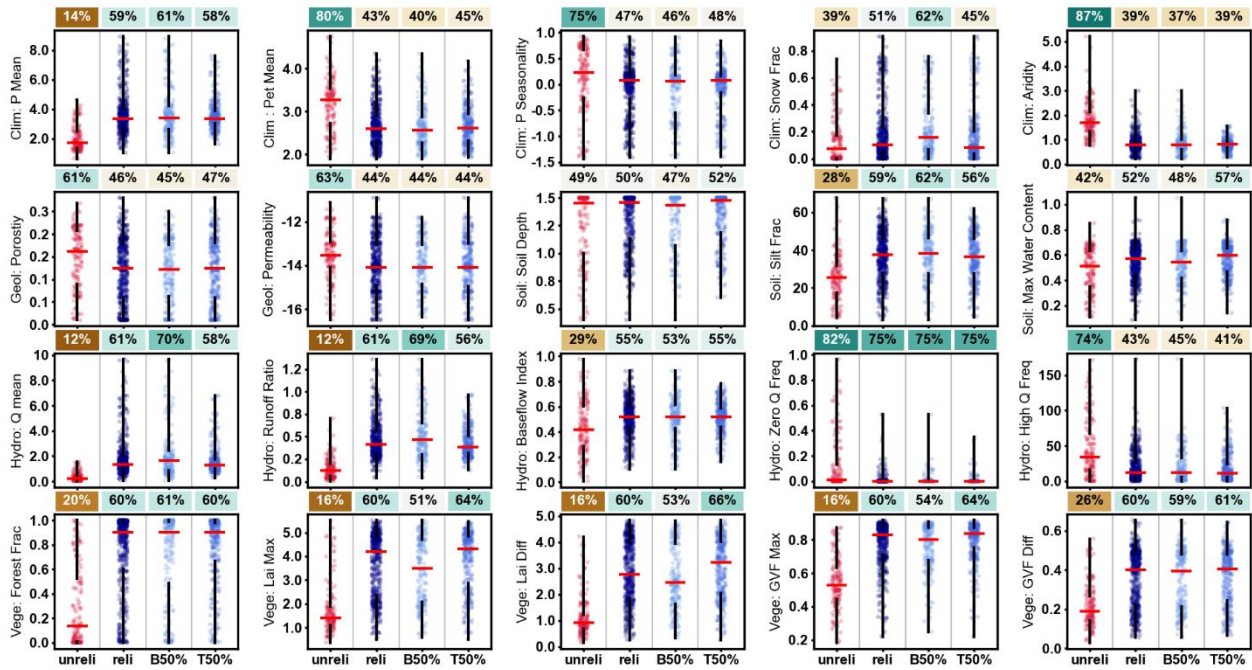

**Figure S11.** Grouping of basin characteristics based on model performance in runoff. Four groups labelled as “unreli”, “reli”, “B50%”, and “T50%” represent basin groupings characterized by unreliable simulations, reliable simulations, below-average model performance, and above-average model performance, respectively. The cumulative probability of the median value for each group is labelled at the top of each panel.

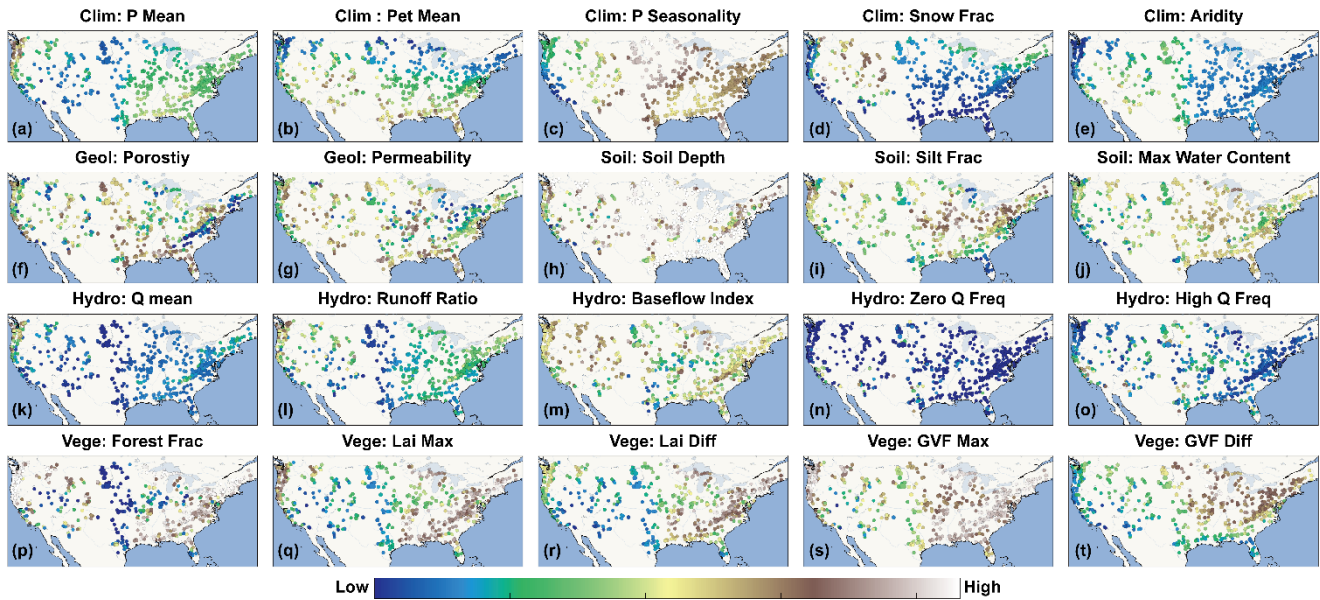

**Figure S12.** Spatial patterns of selected basin characteristics.
